# Supplementary material for: Transcriptome Analysis of Polyhydroxybutyrate Cycle Mutants Reveals Discrete Loci Connecting Nitrogen Utilization and Carbon Storage in Sinorhizobium meliloti
Source: PubMed Central journal article supplement (PMC5596199; doi:10.1128/msystems.00035-17), 2017-09-12

pSymA

pSymB

chromosome

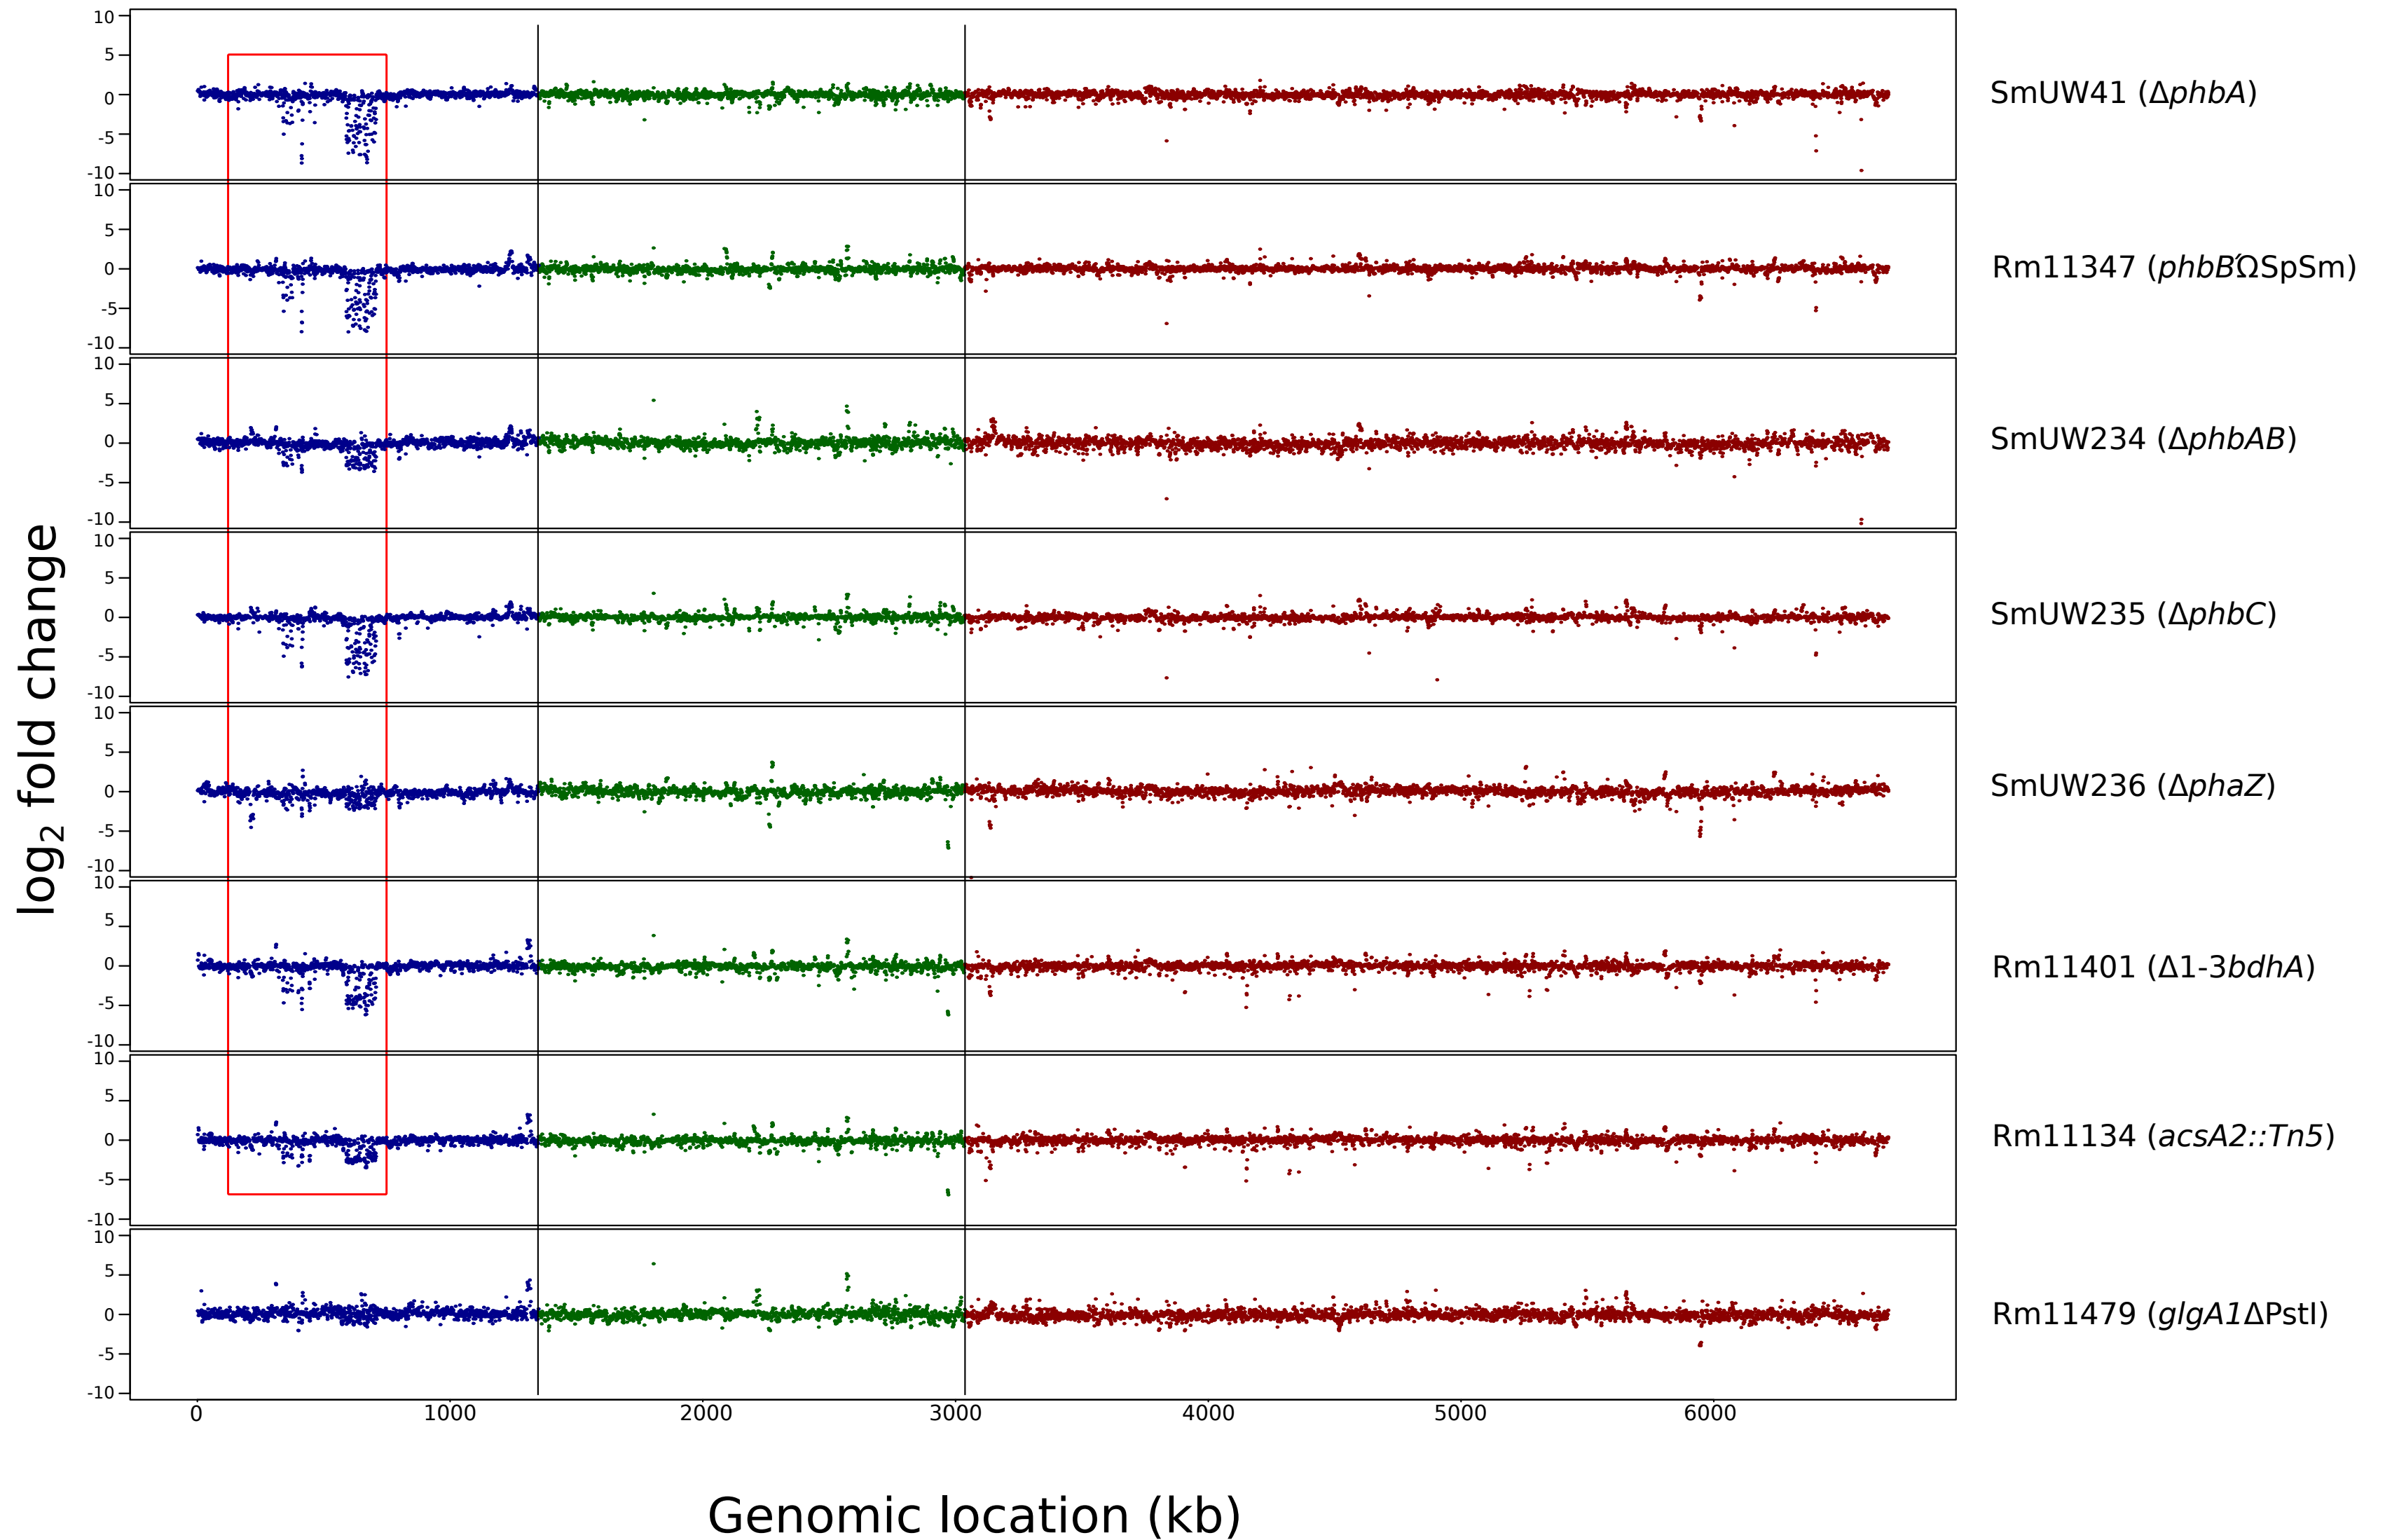

Supplement: sys004172129sf4.pdf [file sys004172129sf4.pdf]
