# Supplementary material for: Transcriptome Analysis of Polyhydroxybutyrate Cycle Mutants Reveals Discrete Loci Connecting Nitrogen Utilization and Carbon Storage in Sinorhizobium meliloti
Source: PubMed Central journal article supplement (PMC5596199; doi:10.1128/msystems.00035-17), 2017-09-12
Supplement: sys004172129sf7.pdf [file sys004172129sf7.pdf]

| cluster <sup>a</sup> | motif                                                                               | e-value | sites <sup>b</sup> | genes in cluster (%) |
|----------------------|-------------------------------------------------------------------------------------|---------|--------------------|----------------------|
| B1                   | 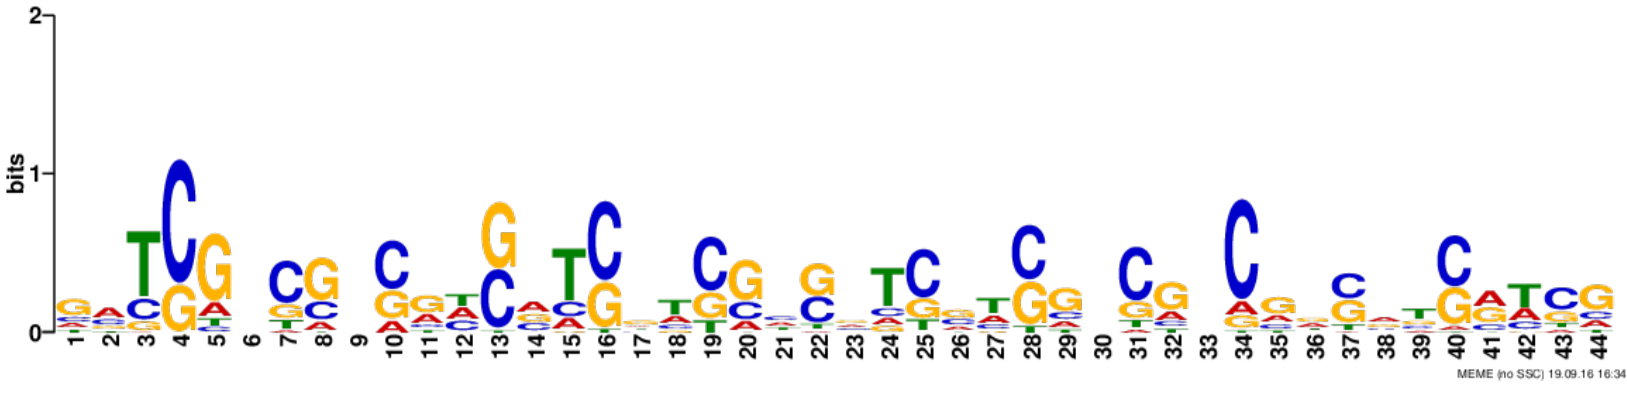   | 4.6e-41 | 163                | 44.4                 |
|                      |    | 5.4e-16 | 9                  | 2.4                  |
| B2                   |    | 6.8e-20 | 9                  | 2.9                  |
| B3                   |  | 1e-51   | 11                 | 1.5                  |
|                      |  | 9.6e-35 | 51                 | 7.1                  |
|                      |  | 2.2e-43 | 14                 | 2.0                  |
|                      |  | 1.2e-16 | 84                 | 11.7                 |
| B4B                  |  | 1.1e-35 | 10                 | 2.7                  |
|                      |  | 3.8e-39 | 10                 | 2.7                  |
|                      |  | 9.5e-16 | 21                 | 5.7                  |
| A                    |  | 3.3e-80 | 47                 | 31.1                 |
|                      |  | 5.3e-17 | 6                  | 4.0                  |
